# Supplementary material
Source: Research Square preprint supplement (doi:10.21203/rs.3.rs-9860282/v1)
Supplement: Supplementary file 1 [file 90619fb204356bc7925ec4a3.docx]

**Supplementary Information for**

Ocean eddy compensation regulates feedbacks amplifying ozone-induced Southern Ocean cooling

Travis R. Prochko, Xue Liu, Qiuying Zhang, Frederic Castruccio, Ping Chang, Gokhan Danabasoglu, Gaopeng Xu, Stephen G. Yeager, Clara Deser, Pedro DiNezio

*Corresponding authors: Travis Prochko and Ping Chang

**Email:** trp2@tamu.edu and ping@tamu.edu

**This PDF file includes:**

Figures S1 to S8


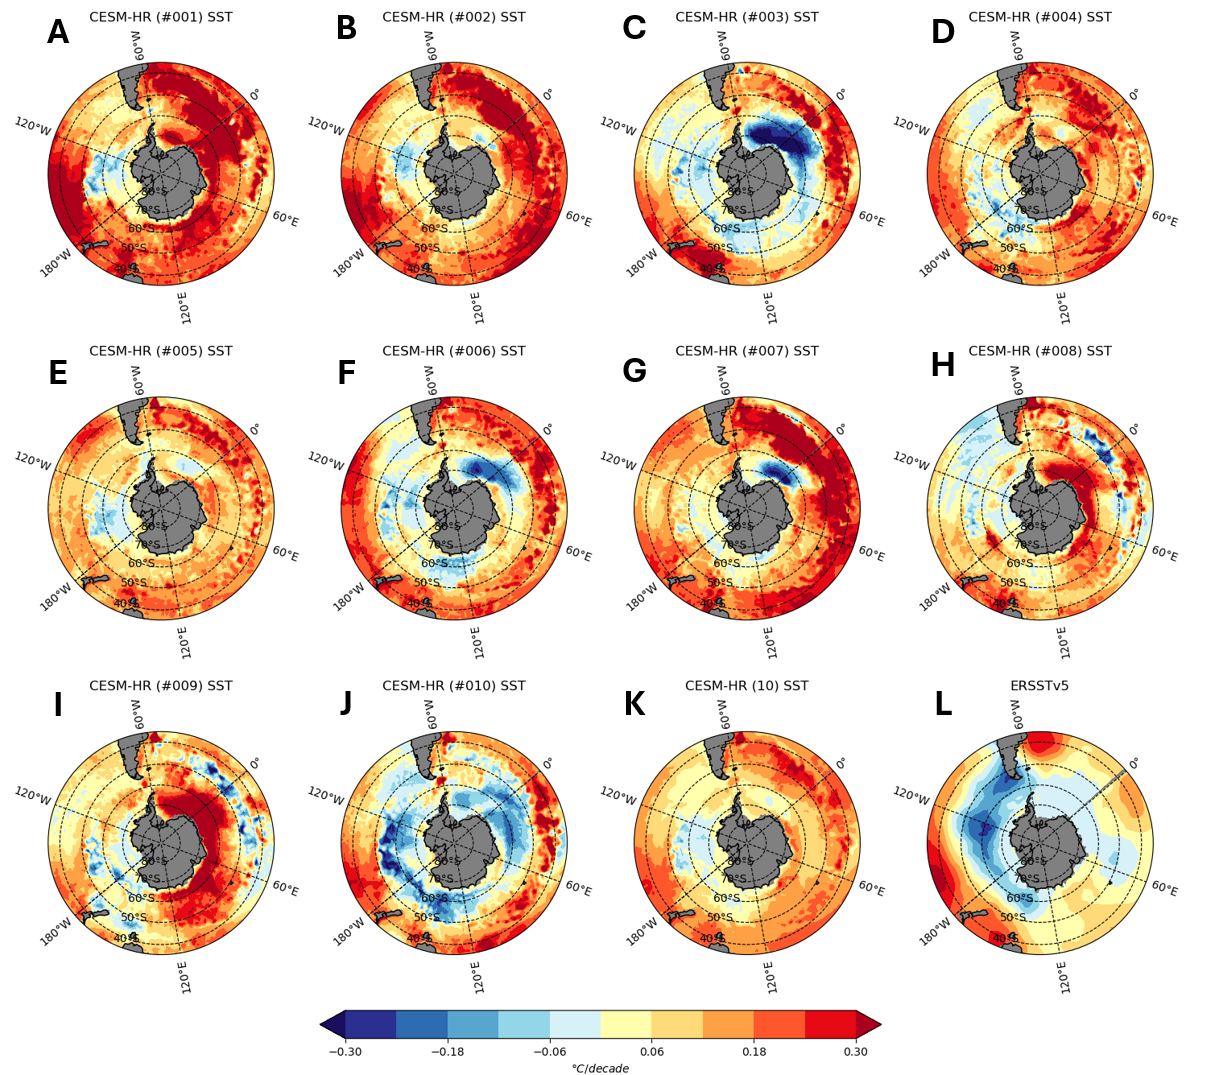


**Fig. S1**: Linear SST trend in each ensemble member of CESM-HR over 1980-2022, compared to ERSST. (A-J) CESM-HR ensemble members #001-#010. (K) CESM-HR ensemble mean. (L) ERSSTv5.


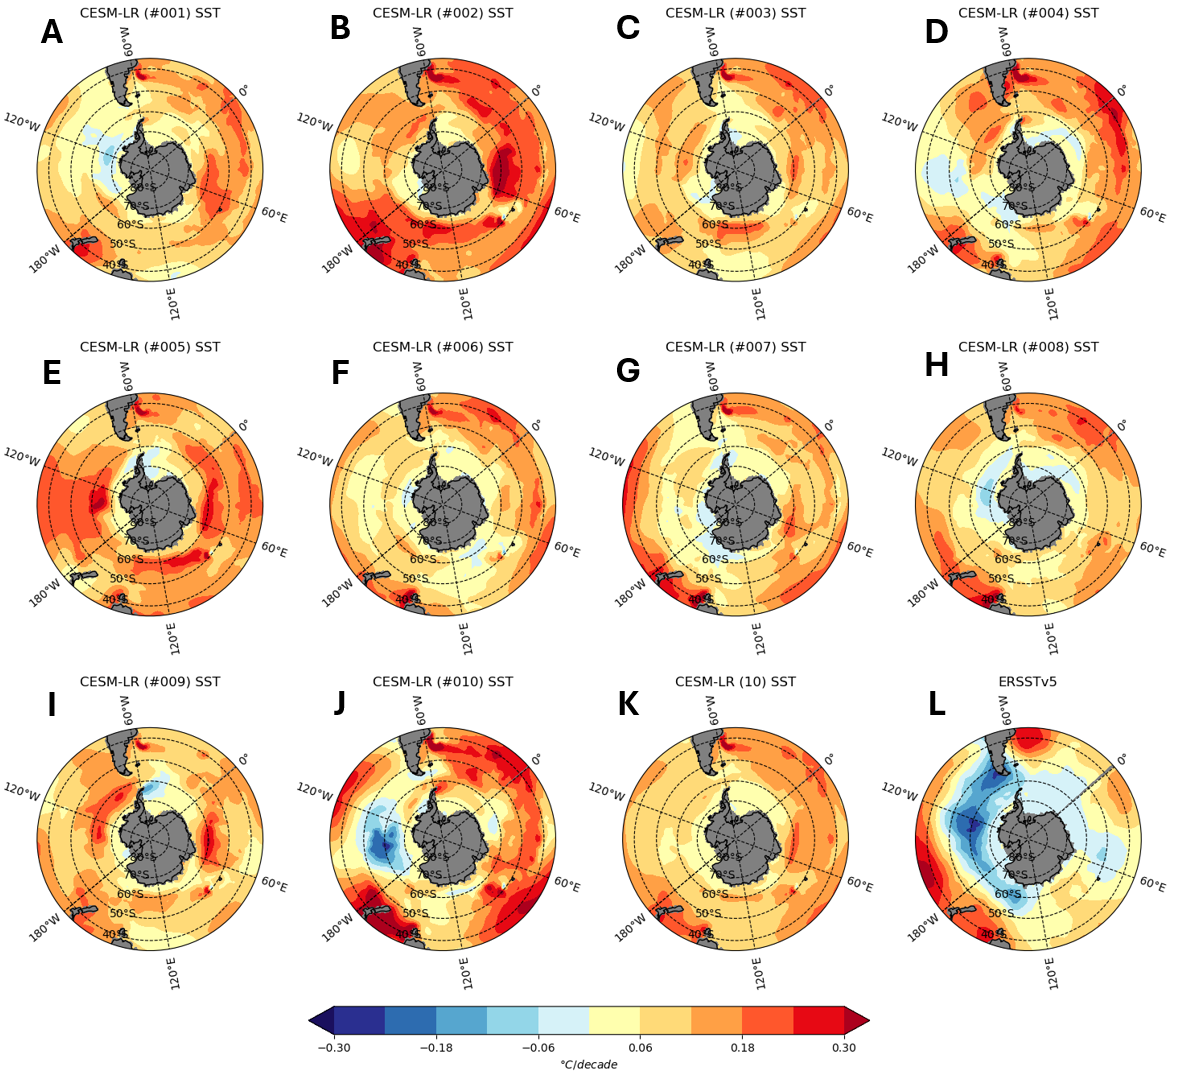


**Fig. S2**: Linear SST trend in each ensemble member of CESM-LR over 1980-2022, compared to ERSSTv5. (A-J) CESM-LR ensemble members #001-#010. (K) CESM-LR ensemble mean. (L) ERSSTv5.


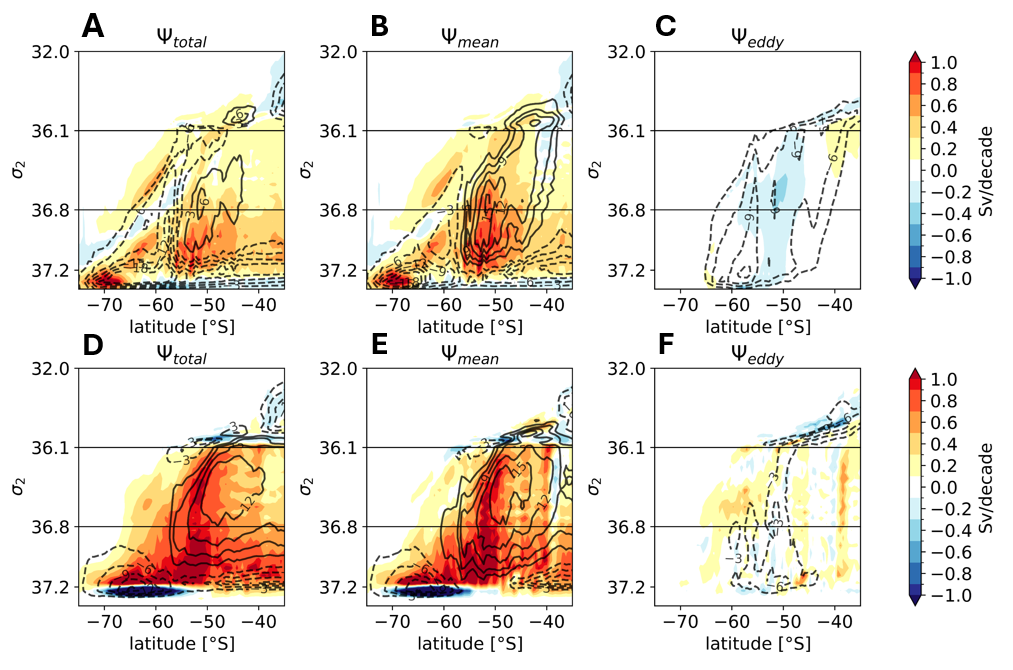


**Fig S3**: Ocean meridional overturning streamfunction in density space: time-average (black contours, 3 Sv intervals) and linear trend (shading) in the Southern Ocean in FOSI-HR and FOSI-LR over the 1979-2017 period. (A and D) total (residual) streamfunction , (B and E) time-mean streamfunction , and (C and F) transient eddy streamfunction .


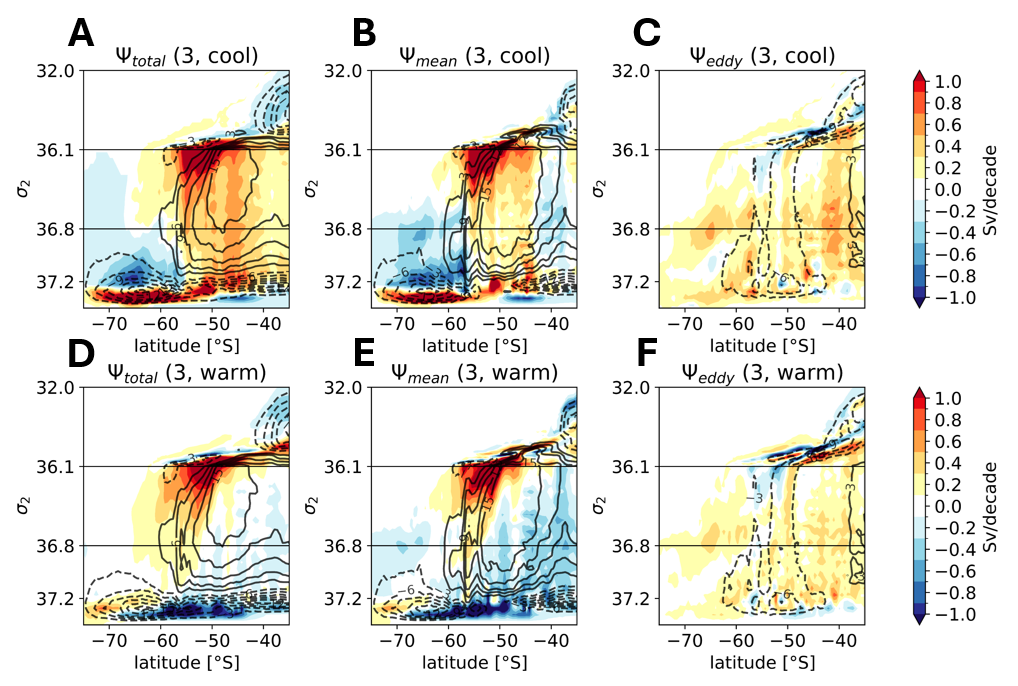


**Fig. S4**: Ocean meridional overturning streamfunction time-average (black contours, 3 Sv intervals) and linear trend (shading) in the Southern Ocean in CESM-HR over the 1980-2022 period. For the three cool members, (A) residual streamfunction , (B) time-mean streamfunction , and (C) transient eddy streamfunction . For the warm members, (D) residual streamfunction , (E) time-mean streamfunction , and (F) transient eddy streamfunction .


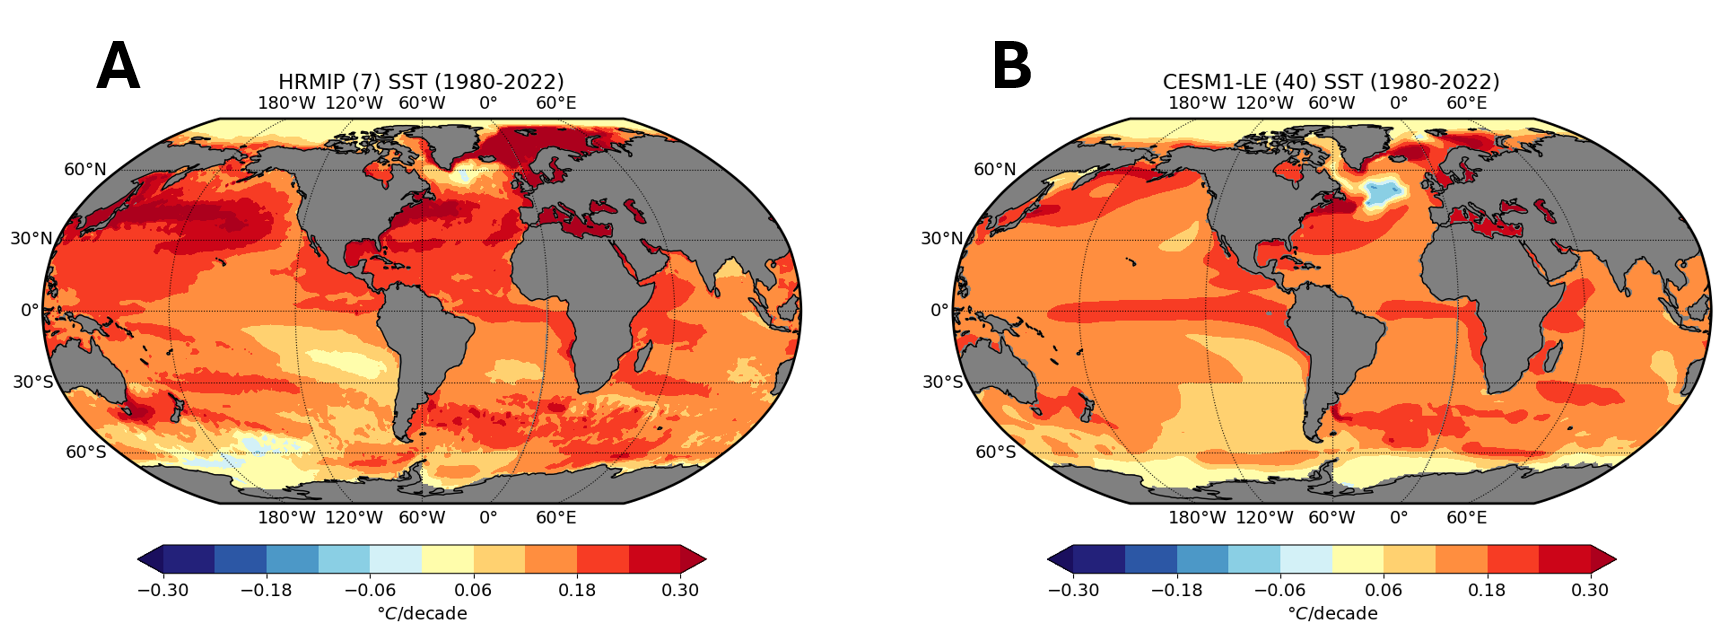


**Fig. S5**: Linear trends in SST over 1980-2022 for (A) HighResMIP, multi-model-mean and (B) CESM1-LE, 40-member ensemble mean.


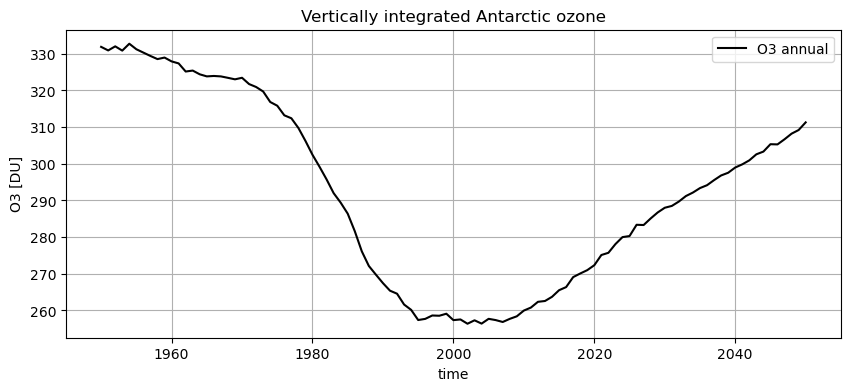
**Fig. S6**: Vertically-integrated annual ozone (O3) averaged over the Antarctic region (63S-90S) for 1950-2050 as prescribed in CESM-HR, CESM-LR, AMIP-HR, and AMIP-LR. The Antarctic region is defined from 90S to the climatological extent of the polar jet, at about 63S.


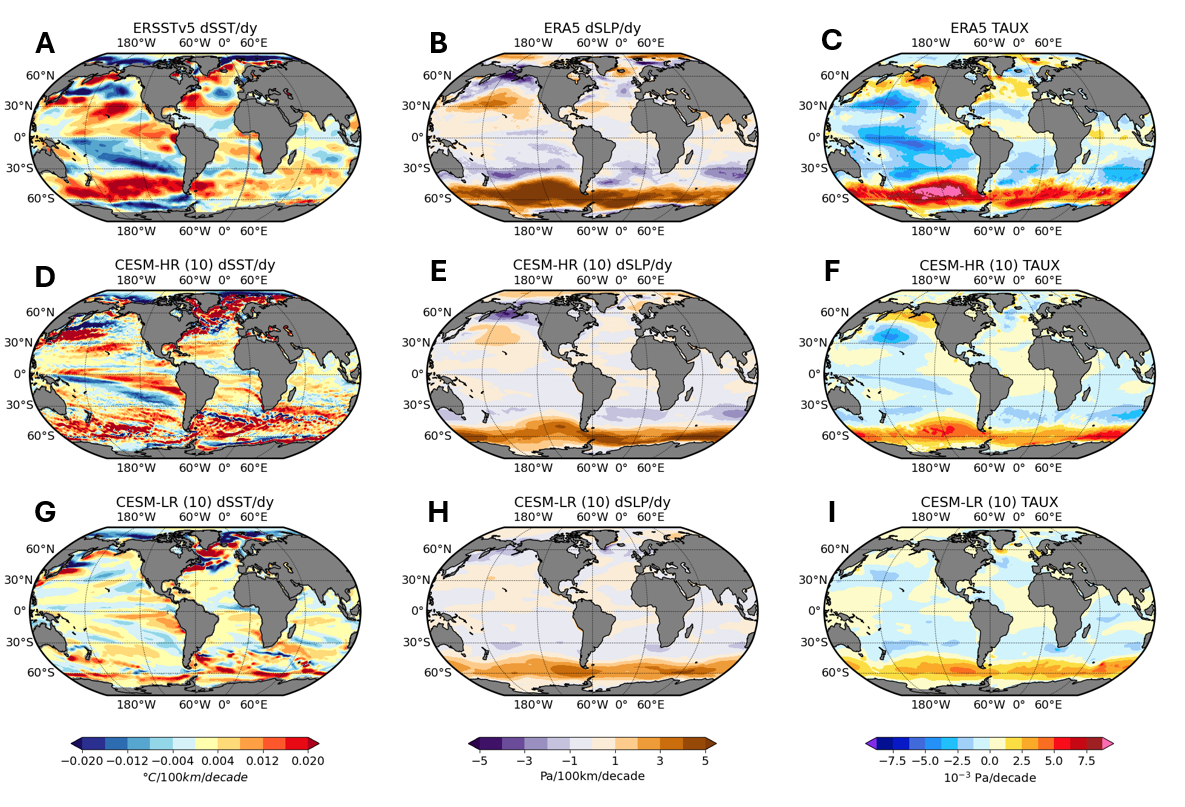


**Fig. S7**: Observation-based and simulated linear trends of meridional gradients of sea surface temperature (dSST/dy) and sea level pressure (dSLP/dy), along with zonal surface wind stress (TAUX) over the 1980-2022 period. (A) Linear trends of dSST/dy in ERSSTv5. Linear trends in ERA5 of (B) dSLP/dy and (C) . Ensemble mean linear trends simulated in CESM-HR of (D) dSST/dy, (E) dSLP/dy, and (F) . Ensemble mean linear trends simulated in CESM-LR of (G) dSST/dy, (H) dSLP/dy, and (I) .


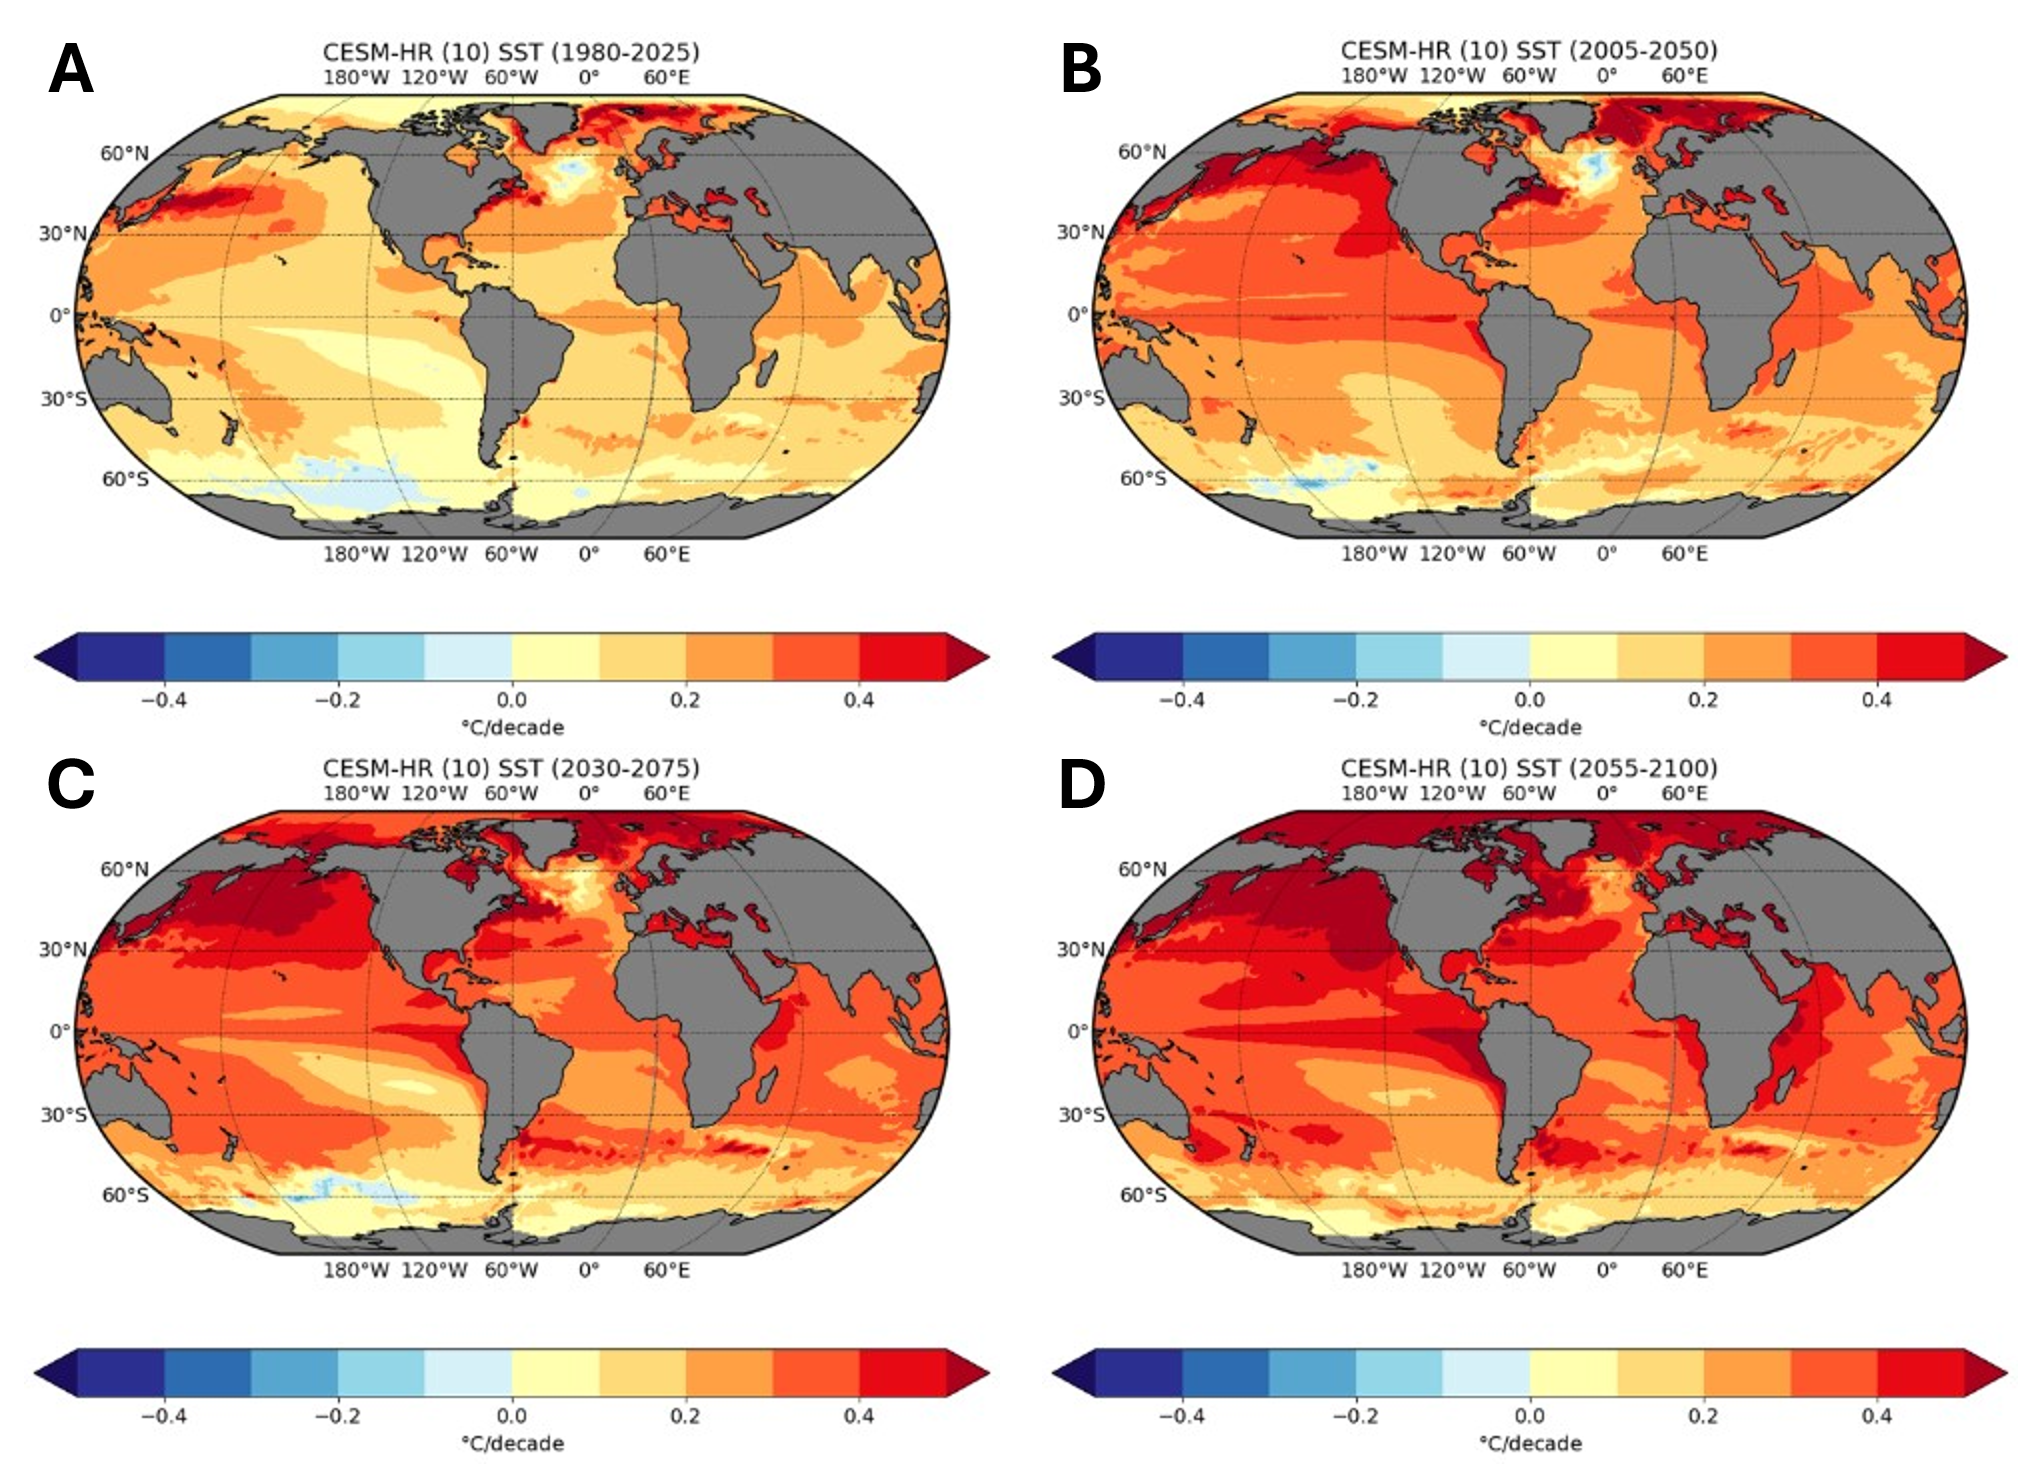


**Figure S8.** Linear trends of simulated SST over the period of (A) 1980-2025, (B) 2005-2050, (C) 2030-2075, and (D) 2055-2100 in CESM-HR future climate simulations under the RCP8.5 emission scenario, averaged over all 10 ensemble members.
